# Supplementary material
Source: publisher site journal article supplement (https://www.dovepress.com/article/288829)
Supplement: Supplementary file 1 [file get_supplementary_file.php]

Supplementary Table 1: 139 active ingredients in Shegan mixture screened out by TCMSP database

| Mol ID    | Molecule Name                                                                                                       | MW     | AlogP | Hdon | Hacc | OB (%) | Caco-2 | BBB   | DL   | FASA- | HL    |
|-----------|---------------------------------------------------------------------------------------------------------------------|--------|-------|------|------|--------|--------|-------|------|-------|-------|
| MOL002322 | isovitexin                                                                                                          | 432.41 | -0.06 | 7    | 10   | 31.29  | -1.24  | -2.01 | 0.72 | 0.33  | 16.45 |
| MOL001735 | Dinatin                                                                                                             | 300.28 | 2.32  | 3    | 6    | 30.97  | 0.48   | -0.49 | 0.27 | 0.28  | 16.44 |
| MOL000449 | Stigmasterol                                                                                                        | 412.77 | 7.64  | 1    | 1    | 43.83  | 1.44   | 1     | 0.76 | 0.22  | 5.57  |
| MOL000351 | Rhamnazin                                                                                                           | 330.31 | 2.01  | 3    | 7    | 47.14  | 0.53   | -0.32 | 0.34 | 0.25  | 13.54 |
| MOL000354 | isorhamnetin                                                                                                        | 316.28 | 1.76  | 4    | 7    | 49.6   | 0.31   | -0.54 | 0.31 | 0.32  | 14.34 |
| MOL003741 | anhydrobelachinal                                                                                                   | 468.74 | 6.34  | 1    | 4    | 43.57  | 0.81   | 0.05  | 0.78 | 0.3   | 4.83  |
| MOL003742 | ardisianone A                                                                                                       | 346.56 | 5.7   | 0    | 3    | 44.22  | 0.8    | 0.14  | 0.25 | 0.27  | 2.83  |
| MOL003743 | belachinal                                                                                                          | 486.76 | 5.58  | 3    | 5    | 31.24  | -0.09  | -0.97 | 0.64 | 0.33  | 5.3   |
| MOL003744 | belamcandal                                                                                                         | 528.8  | 5.07  | 3    | 6    | 30.07  | 0.05   | -0.82 | 0.67 | 0.28  | 4.84  |
| MOL003753 | dihydrokaempferide                                                                                                  | 302.3  | 2     | 3    | 6    | 50.56  | 0.08   | -0.39 | 0.27 | 0.36  | 14.74 |
| MOL003754 | epianhydrobelachinal                                                                                                | 468.74 | 6.34  | 1    | 4    | 43.57  | 0.84   | 0.07  | 0.78 | 0.3   | 5     |
| MOL003757 | iristectorene B                                                                                                     | 685.2  | 12.75 | 2    | 5    | 32.56  | 0.36   | -0.9  | 0.42 | 0.23  | 2.58  |
| MOL003758 | Iristectorigenin (9CI)                                                                                              | 330.31 | 2.03  | 3    | 7    | 71.55  | 0.55   | -0.16 | 0.34 | 0.23  | 16.32 |
| MOL003759 | Iristectorigenin A                                                                                                  | 330.31 | 2.03  | 3    | 7    | 63.36  | 0.54   | -0.12 | 0.34 | 0.22  | 16.82 |
| MOL003769 | Irolone                                                                                                             | 298.26 | 2.1   | 2    | 6    | 46.87  | 0.57   | -0.27 | 0.36 | 0.35  | 19.59 |
| MOL003773 | Mangiferolic acid                                                                                                   | 442.75 | 6.47  | 2    | 3    | 36.16  | 0.66   | -0.06 | 0.84 | 0.25  | 5.71  |
| MOL000006 | luteolin                                                                                                            | 286.25 | 2.07  | 4    | 6    | 36.16  | 0.19   | -0.84 | 0.25 | 0.39  | 15.94 |
| MOL010921 | estrone                                                                                                             | 270.4  | 3.77  | 1    | 2    | 53.56  | 1.01   | 0.83  | 0.32 | 0.3   | 3.5   |
| MOL010922 | Diisooctyl succinate                                                                                                | 342.58 | 5.99  | 0    | 4    | 31.62  | 0.72   | 0.13  | 0.23 | 0.2   | 1.98  |
| MOL002211 | 11,14-eicosadienoic acid<br>(6Z,10E,14E,18E)-<br>2,6,10,15,19,23-<br>hexamethyltetracos-<br>2,6,10,14,18,22-hexaene | 308.56 | 7.3   | 1    | 2    | 39.99  | 1.22   | 0.76  | 0.2  | 0.23  | 5.6   |
| MOL002372 |                                                                                                                     | 410.8  | 11.33 | 0    | 0    | 33.55  | 2.07   | 1.77  | 0.42 | 0.27  | 3.15  |
| MOL000359 | sitosterol                                                                                                          | 414.79 | 8.08  | 1    | 1    | 36.91  | 1.32   | 0.87  | 0.75 | 0.22  | 5.37  |
| MOL005030 | gondoic acid                                                                                                        | 310.58 | 7.75  | 1    | 2    | 30.7   | 1.2    | 0.8   | 0.2  | 0.21  | 4.79  |
| MOL000953 | CLR                                                                                                                 | 386.73 | 7.38  | 1    | 1    | 37.87  | 1.43   | 1.13  | 0.68 | 0.2   | 4.52  |
| MOL000211 | Mairin                                                                                                              | 456.78 | 6.52  | 2    | 3    | 55.38  | 0.73   | 0.22  | 0.78 | 0.26  | 8.87  |
| MOL000492 | (+)-catechin                                                                                                        | 290.29 | 1.92  | 5    | 6    | 54.83  | -0.03  | -0.73 | 0.24 | 0     | 0.61  |
| MOL002311 | Glycyrol                                                                                                            | 366.39 | 4.85  | 2    | 6    | 90.78  | 0.71   | -0.2  | 0.67 | 0.28  | 9.85  |
| MOL003410 | Ziziphin_qt                                                                                                         | 472.78 | 4.39  | 2    | 4    | 66.95  | 0.49   | -0.12 | 0.62 | 0.24  | 10    |
| MOL004355 | Spinasterol                                                                                                         | 412.77 | 7.64  | 1    | 1    | 42.98  | 1.44   | 1.04  | 0.76 | 0.21  | 5.32  |
| MOL004841 | Licochalcone B                                                                                                      | 286.3  | 2.88  | 3    | 5    | 76.76  | 0.47   | -0.46 | 0.19 | 0     | 17.02 |
| MOL004903 | liquiritin                                                                                                          | 418.43 | 0.66  | 5    | 9    | 65.69  | -1.06  | -1.93 | 0.74 | 0     | 17.96 |
| MOL004908 | Glabridin                                                                                                           | 324.4  | 3.95  | 2    | 4    | 53.25  | 0.97   | 0.36  | 0.47 | 0     | 0.03  |
| MOL005017 | Phaseol                                                                                                             | 336.36 | 4.87  | 2    | 5    | 78.77  | 0.76   | -0.06 | 0.58 | 0     | 9.64  |
| MOL007207 | Machiline                                                                                                           | 285.37 | 2.83  | 3    | 4    | 79.64  | 0.78   | 0.09  | 0.24 | 0.27  | 3.7   |
| MOL012922 | I-SPD                                                                                                               | 327.41 | 3.1   | 2    | 5    | 87.35  | 0.76   | 0.21  | 0.54 | 0.24  | 1.68  |
| MOL002773 | beta-carotene                                                                                                       | 536.96 | 12    | 0    | 0    | 37.18  | 2.25   | 1.52  | 0.58 | 0.33  | 4.36  |
| MOL000433 | FA                                                                                                                  | 441.45 | 0.01  | 7    | 13   | 68.96  | -1.5   | -2.59 | 0.71 | 0     | 24.81 |
| MOL010788 | leucopelargonidin                                                                                                   | 290.29 | 1.36  | 5    | 6    | 57.97  | -0.12  | -0.62 | 0.24 | 0.37  | 1.38  |
| MOL002823 | Herbacetin                                                                                                          | 302.25 | 1.5   | 5    | 7    | 36.07  | 0.12   | -0.65 | 0.27 | 0.37  | 14.8  |
| MOL010489 | Resivit                                                                                                             | 306.29 | 1.09  | 6    | 7    | 30.84  | -0.49  | -1.03 | 0.27 | 0.36  | 1.44  |
| MOL000422 | kaempferol                                                                                                          | 286.25 | 1.77  | 4    | 6    | 41.88  | 0.26   | -0.55 | 0.24 | 0     | 14.74 |
| MOL004798 | delphinidin                                                                                                         | 303.26 | 1.4   | 6    | 7    | 40.63  | -0.02  | -0.81 | 0.28 | 0.35  | 1.16  |
| MOL000098 | quercetin                                                                                                           | 302.25 | 1.5   | 5    | 7    | 46.43  | 0.05   | -0.77 | 0.28 | 0.38  | 14.4  |
| MOL000358 | beta-sitosterol                                                                                                     | 414.79 | 8.08  | 1    | 1    | 36.91  | 1.32   | 0.99  | 0.75 | 0.23  | 5.36  |
| MOL001494 | Mandenol                                                                                                            | 308.56 | 6.99  | 0    | 2    | 42     | 1.46   | 1.14  | 0.19 | 0.25  | 5.39  |
| MOL001506 | Supraene                                                                                                            | 410.8  | 11.33 | 0    | 0    | 33.55  | 2.08   | 1.73  | 0.42 | 0.27  | 2.72  |
| MOL001755 | 24-Ethylcholest-4-en-3-one                                                                                          | 412.77 | 8.18  | 0    | 1    | 36.08  | 1.46   | 1.22  | 0.76 | 0.25  | 5.49  |
| MOL001771 | poriferast-5-en-3beta-ol                                                                                            | 414.79 | 8.08  | 1    | 1    | 36.91  | 1.45   | 1.14  | 0.75 | 0     | 5.07  |
| MOL002881 | Diosmetin                                                                                                           | 300.28 | 2.32  | 3    | 6    | 31.14  | 0.46   | -0.66 | 0.27 | 0.34  | 16.34 |
| MOL004328 | naringenin                                                                                                          | 272.27 | 2.3   | 3    | 5    | 59.29  | 0.28   | -0.37 | 0.21 | 0.4   | 16.98 |
| MOL004576 | taxifolin                                                                                                           | 304.27 | 1.49  | 5    | 7    | 57.84  | -0.23  | -0.8  | 0.27 | 0.39  | 14.41 |
| MOL005043 | campest-5-en-3beta-ol                                                                                               | 400.76 | 7.63  | 1    | 1    | 37.58  | 1.32   | 0.94  | 0.71 | 0.23  | 4.43  |
| MOL005190 | eriodictyol                                                                                                         | 288.27 | 2.03  | 4    | 6    | 71.79  | 0.17   | -0.54 | 0.24 | 0.38  | 15.81 |
| MOL005573 | Genkwaniin                                                                                                          | 284.28 | 2.59  | 2    | 5    | 37.13  | 0.63   | -0.24 | 0.24 | 0.32  | 16.1  |
| MOL005842 | Pectolinarigenin                                                                                                    | 314.31 | 2.57  | 2    | 6    | 41.17  | 0.7    | -0.09 | 0.3  | 0     | 16.56 |
| MOL007214 | (+)-Leucocyanidin                                                                                                   | 306.29 | 1.09  | 6    | 7    | 37.61  | -0.45  | -1    | 0.27 | 0.36  | 0.9   |
| MOL011319 | Trufflex OBP                                                                                                        | 334.5  | 6.02  | 0    | 4    | 43.74  | 0.9    | 0.6   | 0.24 | 0.3   | 4.9   |
| MOL001689 | acacetin                                                                                                            | 284.28 | 2.59  | 2    | 5    | 34.97  | 0.67   | -0.05 | 0.24 | 0.35  | 17.25 |
| MOL000173 | wogonin                                                                                                             | 284.28 | 2.59  | 2    | 5    | 30.68  | 0.79   | 0.04  | 0.23 | 0.32  | 17.75 |
| MOL000228 | (2R)-7-hydroxy-5-methoxy-2-<br>phenylchroman-4-one                                                                  | 270.3  | 2.82  | 1    | 4    | 55.23  | 0.87   | 0.26  | 0.2  | 0.34  | 17.02 |
| MOL002714 | baicalein                                                                                                           | 270.25 | 2.33  | 3    | 5    | 33.52  | 0.63   | -0.05 | 0.21 | 0.36  | 16.25 |
| MOL002908 | 5,8,2'-Trihydroxy-7-<br>methoxyflavone                                                                              | 300.28 | 2.32  | 3    | 6    | 37.01  | 0.76   | -0.07 | 0.27 | 0.28  | 16.17 |

|           |                                                                                                                                                |        |       |   |    |        |       |       |      |      |       |
|-----------|------------------------------------------------------------------------------------------------------------------------------------------------|--------|-------|---|----|--------|-------|-------|------|------|-------|
| MOL002909 | 5,7,2,5-tetrahydroxy-8,6-dimethoxyflavone                                                                                                      | 376.34 | 2.02  | 4 | 9  | 33.82  | 0.35  | -0.59 | 0.45 | 0.19 | 15.94 |
| MOL002910 | Carthamidin                                                                                                                                    | 288.27 | 2.03  | 4 | 6  | 41.15  | 0.16  | -0.42 | 0.24 | 0.36 | 15.81 |
| MOL002911 | 2,6,2',4'-tetrahydroxy-6'-methoxychaleone                                                                                                      | 302.3  | 2.62  | 4 | 6  | 69.04  | -0.07 | -0.32 | 0.22 | 0.34 | 21.89 |
| MOL002913 | Dihydrobaicalin_qt                                                                                                                             | 272.27 | 2.3   | 3 | 5  | 40.04  | 0.56  | 0.18  | 0.21 | 0.36 | 16.13 |
| MOL002914 | Eriodyctiol (flavanone)                                                                                                                        | 288.27 | 2.03  | 4 | 6  | 41.35  | 0.05  | -0.66 | 0.24 | 0.39 | 15.88 |
| MOL002915 | Salvigenin                                                                                                                                     | 328.34 | 2.82  | 1 | 6  | 49.07  | 0.86  | -0.03 | 0.33 | 0.21 | 15.87 |
| MOL002917 | 5,2',6'-Trihydroxy-7,8-dimethoxyflavone                                                                                                        | 330.31 | 2.3   | 3 | 7  | 45.05  | 0.48  | -0.11 | 0.33 | 0.25 | 16.37 |
| MOL002925 | 5,7,2',6'-Tetrahydroxyflavone                                                                                                                  | 286.25 | 2.07  | 4 | 6  | 37.01  | 0.18  | -0.56 | 0.24 | 0.38 | 18    |
| MOL002926 | dihydrooroxylin A                                                                                                                              | 286.3  | 2.55  | 2 | 5  | 38.72  | 0.71  | 0.03  | 0.23 | 0.29 | 17.58 |
| MOL002927 | Skullcapflavone II                                                                                                                             | 374.37 | 2.54  | 2 | 8  | 69.51  | 0.68  | -0.07 | 0.44 | 0.2  | 16.14 |
| MOL002928 | oroxylin a                                                                                                                                     | 284.28 | 2.59  | 2 | 5  | 41.37  | 0.76  | 0.13  | 0.23 | 0.29 | 17.15 |
| MOL002932 | Panicolin                                                                                                                                      | 314.31 | 2.57  | 2 | 6  | 76.26  | 0.84  | 0.31  | 0.29 | 0.24 | 16.78 |
| MOL002933 | 5,7,4'-Trihydroxy-8-methoxyflavone                                                                                                             | 300.28 | 2.32  | 3 | 6  | 36.56  | 0.46  | -0.4  | 0.27 | 0.31 | 16.93 |
| MOL002934 | NEOBAICALEIN                                                                                                                                   | 374.37 | 2.54  | 2 | 8  | 104.34 | 0.74  | -0.19 | 0.44 | 0.18 | 16.5  |
| MOL002937 | DIHYDROOROXYLIN                                                                                                                                | 286.3  | 2.55  | 2 | 5  | 66.06  | 0.67  | 0.13  | 0.23 | 0.31 | 17.17 |
| MOL000525 | Norwogonin                                                                                                                                     | 270.25 | 2.33  | 3 | 5  | 39.4   | 0.6   | -0.17 | 0.21 | 0.39 | 16.93 |
| MOL000552 | 5,2'-Dihydroxy-6,7,8-trimethoxyflavone                                                                                                         | 344.34 | 2.55  | 2 | 7  | 31.71  | 0.93  | 0     | 0.35 | 0.22 | 16.47 |
| MOL000073 | ent-Epicatechin                                                                                                                                | 290.29 | 1.92  | 5 | 6  | 48.96  | 0.02  | -0.64 | 0.24 | 0.34 | 0.63  |
| MOL001458 | coptisine                                                                                                                                      | 320.34 | 3.25  | 0 | 4  | 30.67  | 1.21  | 0.32  | 0.86 | 0.26 | 9.33  |
| MOL001490 | bis[(2S)-2-ethylhexyl] benzene-1,2-dicarboxylate                                                                                               | 390.62 | 7.57  | 0 | 4  | 43.59  | 0.98  | 0.68  | 0.35 | 0.28 | 3.02  |
| MOL002879 | Diop                                                                                                                                           | 390.62 | 7.44  | 0 | 4  | 43.59  | 0.79  | 0.26  | 0.39 | 0.28 | 3.6   |
| MOL008206 | Moslosooflavone                                                                                                                                | 298.31 | 2.84  | 1 | 5  | 44.09  | 1.01  | 0.54  | 0.25 | 0.26 | 17.02 |
| MOL010415 | 11,13-Eicosadienoic acid, methyl ester                                                                                                         | 322.59 | 7.55  | 0 | 2  | 39.28  | 1.46  | 1.24  | 0.23 | 0.21 | 5.44  |
| MOL012245 | 5,7,4'-trihydroxy-6-methoxyflavanone                                                                                                           | 302.3  | 2.28  | 3 | 6  | 36.63  | 0.43  | -0.32 | 0.27 | 0.28 | 16.12 |
| MOL012246 | 5,7,4'-trihydroxy-8-methoxyflavanone                                                                                                           | 302.3  | 2.28  | 3 | 6  | 74.24  | 0.37  | -0.43 | 0.26 | 0.31 | 16.85 |
| MOL012266 | rivularin                                                                                                                                      | 344.34 | 2.55  | 2 | 7  | 37.94  | 0.65  | -0.13 | 0.37 | 0.21 | 16.25 |
| MOL013076 | (8S,9R)-9-hydroxy-8-(2-hydroxypropan-2-yl)-8,9-dihydrofuro[2,3-h]chromen-2-one                                                                 | 262.28 | 1.2   | 2 | 5  | 37.3   | 0.1   | -0.19 | 0.2  | 0.35 | 3     |
| MOL013077 | Decursin                                                                                                                                       | 328.39 | 3.96  | 0 | 5  | 39.27  | 0.77  | 0.25  | 0.38 | 0.29 | -1.77 |
| MOL013078 | praeruptorin E                                                                                                                                 | 428.52 | 4.88  | 0 | 7  | 51.22  | 0.37  | -0.05 | 0.66 | 0.35 | 5.37  |
| MOL013079 | dl-praeruptorin a                                                                                                                              | 386.43 | 3.5   | 0 | 7  | 46.46  | 0.52  | 0.09  | 0.53 | 0.31 | 4.5   |
| MOL013081 | Decussine                                                                                                                                      | 301.42 | 3.43  | 0 | 2  | 39.83  | 1.74  | 1.12  | 0.65 | 0.2  | 9.29  |
| MOL013083 | Skimmin (8Cl)                                                                                                                                  | 324.31 | -0.27 | 4 | 8  | 38.35  | -1.02 | -1.57 | 0.32 | 0.3  | 3.57  |
| MOL013087 | Peucedanocoumarin II                                                                                                                           | 386.43 | 3.5   | 0 | 7  | 63.48  | 0.25  | -0.26 | 0.53 | 0.38 | 3.17  |
| MOL013093 | rubicauloside                                                                                                                                  | 602.65 | -1.5  | 7 | 15 | 58.36  | -1.94 | -2.52 | 0.71 | 0.24 | 1.28  |
| MOL013094 | 8-[(2R)-2,3-dihydroxy-3-methylbutyl]-5,7-dimethoxy-coumarin                                                                                    | 308.36 | 1.66  | 2 | 6  | 48.57  | -0.03 | -0.5  | 0.21 | 0.24 | 2.05  |
| MOL013095 | Sporidesmin                                                                                                                                    | 474    | 1.35  | 2 | 9  | 58.31  | -0.08 | -0.54 | 0.76 | 0.38 | 15.31 |
| MOL013098 | [(9R)-8,8-dimethyl-2-oxo-9,10-dihydropyrano[6,5-h]chromen-9-yl] (Z)-2-methylbut-2-enoate                                                       | 328.39 | 3.96  | 0 | 5  | 87.48  | 0.61  | 0.3   | 0.37 | 0.36 | 1.98  |
| MOL013100 | (2S)-2-(1-hydroxy-1-methyl-ethyl)-9-[(2S,3R,4R,5S,6R)-3,4,5-trihydroxy-6-methylol-tetrahydropyran-2-yl]oxy-2,3-dihydrofuro[3,2-g]chromen-7-one | 424.44 | -0.14 | 5 | 10 | 45.33  | -1.31 | -1.65 | 0.73 | 0.27 | 5.23  |
| MOL013101 | rutarin_qt                                                                                                                                     | 262.28 | 1.76  | 2 | 5  | 70.1   | 0.2   | -0.28 | 0.2  | 0.32 | 3.11  |
| MOL013103 | 532-16-1                                                                                                                                       | 366.54 | 7     | 0 | 3  | 46.57  | 1.43  | 0.85  | 0.44 | 0.31 | 3.69  |
| MOL001941 | Ammidin                                                                                                                                        | 270.3  | 3.65  | 0 | 4  | 34.55  | 1.13  | 0.92  | 0.22 | 0.28 | -1.35 |
| MOL001942 | isoimperatorin                                                                                                                                 | 270.3  | 3.65  | 0 | 4  | 45.46  | 0.97  | 0.66  | 0.23 | 0.27 | -1.44 |
| MOL002644 | Phellopterin                                                                                                                                   | 300.33 | 3.64  | 0 | 5  | 40.19  | 0.98  | 0.48  | 0.28 | 0.24 | -1.64 |
| MOL004653 | (+)-Anomalin                                                                                                                                   | 426.5  | 5.05  | 0 | 7  | 46.06  | 0.46  | 0     | 0.66 | 0.36 | 1.03  |
| MOL004792 | nodakenin                                                                                                                                      | 408.44 | 0.28  | 4 | 9  | 57.12  | -0.79 | -1.42 | 0.69 | 0.27 | 7.16  |
| MOL005100 | 5,7-dihydroxy-2-(3-hydroxy-4-methoxyphenyl)chroman-4-one                                                                                       | 302.3  | 2.28  | 3 | 6  | 47.74  | 0.28  | -0.3  | 0.27 | 0.31 | 16.51 |
| MOL007154 | tanshinone iia                                                                                                                                 | 294.37 | 4.66  | 0 | 3  | 49.89  | 1.05  | 0.7   | 0.4  | 0.31 | 23.56 |
| MOL009361 | 13,15-Dideoxyaconitine                                                                                                                         | 613.82 | 0.34  | 1 | 10 | 34.67  | 0.2   | -0.31 | 0.25 | 0.2  | 20.74 |
| MOL009380 | bisdehydrostemoninine                                                                                                                          | 385.5  | 4.09  | 0 | 5  | 38.51  | 0.51  | -0.21 | 0.73 | 0.29 | 2.41  |
| MOL009436 | stemotinine                                                                                                                                    | 335.44 | 1.94  | 0 | 6  | 38.69  | 0.26  | -0.05 | 0.46 | 0.27 | 1.84  |
| MOL009423 | sessilistemonamine A                                                                                                                           | 391.56 | 2.86  | 1 | 6  | 40.28  | -0.12 | -0.44 | 0.73 | 0.29 | 2.31  |

|           |                                                                                                                                                         |        |      |   |   |       |       |       |      |      |       |
|-----------|---------------------------------------------------------------------------------------------------------------------------------------------------------|--------|------|---|---|-------|-------|-------|------|------|-------|
| MOL009424 | sessilistemonamine B                                                                                                                                    | 391.56 | 2.86 | 1 | 6 | 40.64 | 0.29  | -0.29 | 0.73 | 0.28 | 3.15  |
| MOL009409 | oxystemoninine                                                                                                                                          | 407.56 | 2.43 | 1 | 7 | 42.79 | -0.03 | -0.51 | 0.77 | 0.28 | 2.69  |
| MOL009419 | sessilifoliamide H                                                                                                                                      | 421.54 | 1.31 | 1 | 8 | 43.68 | -0.15 | -0.57 | 0.68 | 0.3  | 6.36  |
| MOL009394 | stemonamine                                                                                                                                             | 317.42 | 2.12 | 0 | 5 | 45.19 | 0.56  | 0.48  | 0.35 | 0.28 | 5.97  |
| MOL009411 | protostemotinine                                                                                                                                        | 415.53 | 2.74 | 0 | 7 | 45.99 | 0.03  | -0.19 | 0.75 | 0.32 | 3.86  |
| MOL009382 | bisdehydrostemoninine B                                                                                                                                 | 387.52 | 4.16 | 1 | 5 | 46.05 | 0.33  | -0.45 | 0.64 | 0.26 | 1.96  |
| MOL009377 | bisdehydroneotuberostemonine                                                                                                                            | 371.52 | 4.37 | 0 | 4 | 51.14 | 0.68  | 0.15  | 0.74 | 0.27 | 9.3   |
| MOL009387 | didehydrotuberostemonine                                                                                                                                | 371.52 | 4.37 | 0 | 4 | 51.91 | 0.7   | 0.19  | 0.74 | 0.27 | 8.12  |
| MOL009386 | 3,3'-bis-(3,4-dihydro-4-hydroxy-6-methoxy)-2H-1-benzopyran                                                                                              | 358.42 | 1.82 | 2 | 6 | 52.11 | 0.14  | -0.55 | 0.54 | 0.26 | 3.76  |
| MOL009363 | tuberostemonine C                                                                                                                                       | 375.56 | 3.6  | 0 | 5 | 55.34 | 0.68  | 0.45  | 0.74 | 0.27 | 11.17 |
| MOL001558 | sesamin                                                                                                                                                 | 354.38 | 2.24 | 0 | 6 | 56.55 | 0.75  | -0.08 | 0.83 | 0.31 | 13.44 |
| MOL005384 | suchilactone                                                                                                                                            | 368.41 | 3.73 | 0 | 6 | 57.52 | 0.82  | 0.28  | 0.56 | 0.28 | 9.03  |
| MOL005360 | malkangunin                                                                                                                                             | 432.56 | 1.84 | 2 | 7 | 57.71 | 0.22  | -0.17 | 0.63 | 0.3  | 4.09  |
| MOL009422 | sessilifoline B                                                                                                                                         | 277.45 | 2.8  | 0 | 3 | 58.81 | 1.23  | 1.28  | 0.29 | 0.23 | 9.95  |
| MOL009374 | 7-methoxy-3-methyl-2,5-dihydroxy-9,10-dihydrophenanthrene                                                                                               | 256.32 | 3.88 | 2 | 3 | 59    | 1.12  | 0.49  | 0.21 | 0.3  | -0.42 |
| MOL009381 | bisdehydrostemoninine A                                                                                                                                 | 401.5  | 3.59 | 1 | 6 | 62.64 | 0.06  | -0.49 | 0.68 | 0.28 | 15.49 |
| MOL009414 | sessilifoliamide C                                                                                                                                      | 291.43 | 2.78 | 0 | 4 | 65.87 | 0.72  | 0.47  | 0.2  | 0.29 | 4.99  |
| MOL009434 | stemoninoamide                                                                                                                                          | 305.41 | 1.8  | 0 | 5 | 66.7  | 0.42  | 0     | 0.33 | 0.28 | 2.98  |
| MOL009430 | stemonamide                                                                                                                                             | 329.43 | 0.95 | 0 | 5 | 67.46 | 0.24  | -0.08 | 0.38 | 0.29 | 5.51  |
| MOL009388 | dihydrostemoninine                                                                                                                                      | 391.56 | 3.01 | 0 | 6 | 68.01 | 0.44  | -0.08 | 0.72 | 0.26 | 3.14  |
| MOL000392 | formononetin                                                                                                                                            | 268.28 | 2.58 | 1 | 4 | 69.67 | 0.78  | 0.02  | 0.21 | 0    | 17.04 |
| MOL009379 | 2-oxostenine                                                                                                                                            | 291.43 | 2.04 | 0 | 4 | 72.94 | 0.68  | 0.4   | 0.34 | 0.27 | 8.15  |
| MOL009433 | stemoninine B                                                                                                                                           | 387.52 | 3.74 | 0 | 5 | 74.77 | 0.53  | -0.17 | 0.73 | 0.25 | 2.32  |
| MOL009431 | stemonine                                                                                                                                               | 389.54 | 3.36 | 0 | 6 | 81.75 | 0.51  | -0.07 | 0.72 | 0.3  | 3.33  |
| MOL009441 | (3S,3'R,4'R,9S,9aS)-4'-hydroxy-3'-methyl-3-[(2S,4S)-4-methyl-5-oxoxolan-2-yl]spiro[1,2,3,5,6,7,8,9a-octahydropyrrolo[1,2-a]azepine-9,5'-oxolane]-2'-one | 337.46 | 1.95 | 1 | 6 | 85.52 | -0.02 | -0.53 | 0.38 | 0.29 | 2.88  |
| MOL002897 | epiberberine                                                                                                                                            | 336.39 | 3.45 | 0 | 4 | 43.09 | 1.17  | 0.4   | 0.78 | 0.19 | 6.1   |

ID, molecular name, and various parameters corresponding to each active ingredients. These parameters include molecular weight (MW), AlogP for representing the partition coefficient between octanol and water, Hdon and Hacc for number of possible hydrogen-bond donors and acceptors, respectively, oral bioavailability (OB), Caco-2 permeability to represent the intestinal epithelial permeability, blood-brain barrier (BBB), drug-likeness (DL), Fractional water accessible surface area of all atoms with negative partial charge (FASA-), and drug half-life (HL).

Supplementary Table 2: Active Ingredients-related targets in SGM

| Mol ID    | Molecule Name | Target Symbol | Target Name                                          |
|-----------|---------------|---------------|------------------------------------------------------|
| MOL000211 | Mairin        | PGR           | Progesterone receptor                                |
| MOL002311 | Glycyrol      | NOS2          | Nitric oxide synthase, inducible                     |
| MOL002311 | Glycyrol      | ESR1          | Estrogen receptor                                    |
| MOL002311 | Glycyrol      | PPARG         | Peroxisome proliferator activated receptor gamma     |
| MOL002311 | Glycyrol      | PTGS2         | Prostaglandin G/H synthase 2                         |
| MOL002311 | Glycyrol      | VEGFR2        | Vascular endothelial growth factor receptor 2        |
| MOL002311 | Glycyrol      | MAPK14        | Mitogen-activated protein kinase 14                  |
| MOL002311 | Glycyrol      | GSK3B         | Glycogen synthase kinase-3 beta                      |
| MOL002311 | Glycyrol      | CHEK1         | Serine/threonine-protein kinase Chk1                 |
| MOL002311 | Glycyrol      | PIM1          | Proto-oncogene serine/threonine-protein kinase Pim-1 |
| MOL002311 | Glycyrol      | CCNA2         | Cyclin-A2                                            |
| MOL004903 | liquiritin    | F10           | Coagulation factor Xa                                |
| MOL004903 | liquiritin    | F7            | Coagulation factor VII                               |
| MOL004903 | liquiritin    | CALM1         | Calmodulin                                           |
| MOL004903 | liquiritin    | PTGS2         | Prostaglandin G/H synthase 2                         |
| MOL004903 | liquiritin    | VEGFR2        | Vascular endothelial growth factor receptor 2        |
| MOL004903 | liquiritin    | SOD1          | Superoxide dismutase [Cu-Zn]                         |
| MOL004908 | Glabridin     | NOS2          | Nitric oxide synthase, inducible                     |
| MOL004908 | Glabridin     | CHRM1         | Muscarinic acetylcholine receptor M1                 |
| MOL004908 | Glabridin     | ESR1          | Estrogen receptor                                    |
| MOL004908 | Glabridin     | AR            | Androgen receptor                                    |
| MOL004908 | Glabridin     | SCN5A         | Sodium channel protein type 5 subunit alpha          |
| MOL004908 | Glabridin     | PPARG         | Peroxisome proliferator activated receptor gamma     |
| MOL004908 | Glabridin     | PTGS2         | Prostaglandin G/H synthase 2                         |
| MOL004908 | Glabridin     | RXRA          | Retinoic acid receptor RXR-alpha                     |
| MOL004908 | Glabridin     | ACHE          | Acetylcholinesterase                                 |
| MOL004908 | Glabridin     | ADRA1B        | Alpha-1B adrenergic receptor                         |
| MOL004908 | Glabridin     | ADRB2         | Beta-2 adrenergic receptor                           |
| MOL004908 | Glabridin     | ESR2          | Estrogen receptor beta                               |
| MOL004908 | Glabridin     | MAPK14        | Mitogen-activated protein kinase 14                  |
| MOL004908 | Glabridin     | GSK3B         | Glycogen synthase kinase-3 beta                      |
| MOL004908 | Glabridin     | CDK2          | Cell division protein kinase 2                       |
| MOL004908 | Glabridin     | CHEK1         | Serine/threonine-protein kinase Chk1                 |
| MOL004908 | Glabridin     | PRKACA        | mRNA of PKA Catalytic Subunit C-alpha                |
| MOL004908 | Glabridin     | RXRB          | Retinoic acid receptor RXR-beta                      |
| MOL004908 | Glabridin     | IGHG1         | Ig gamma-1 chain C region                            |
| MOL004908 | Glabridin     | PRSS1         | Trypsin-1                                            |
| MOL004908 | Glabridin     | PIM1          | Proto-oncogene serine/threonine-protein kinase Pim-1 |
| MOL004908 | Glabridin     | CCNA2         | Cyclin-A2                                            |
| MOL004908 | Glabridin     | NCOA2         | Nuclear receptor coactivator 2                       |
| MOL004908 | Glabridin     | NCOA1         | Nuclear receptor coactivator 1                       |
| MOL004908 | Glabridin     | CALM1         | Calmodulin                                           |
| MOL005017 | Phaseol       | ESR1          | Estrogen receptor                                    |
| MOL005017 | Phaseol       | AR            | Androgen receptor                                    |
| MOL005017 | Phaseol       | PPARG         | Peroxisome proliferator activated receptor gamma     |
| MOL005017 | Phaseol       | PTGS2         | Prostaglandin G/H synthase 2                         |
| MOL005017 | Phaseol       | VEGFR2        | Vascular endothelial growth factor receptor 2        |
| MOL005017 | Phaseol       | MAPK14        | Mitogen-activated protein kinase 14                  |
| MOL005017 | Phaseol       | GSK3B         | Glycogen synthase kinase-3 beta                      |
| MOL005017 | Phaseol       | HSP90         | Heat shock protein HSP 90                            |
| MOL005017 | Phaseol       | CDK2          | Cell division protein kinase 2                       |
| MOL005017 | Phaseol       | CHEK1         | Serine/threonine-protein kinase Chk1                 |
| MOL005017 | Phaseol       | PRKACA        | mRNA of PKA Catalytic Subunit C-alpha                |
| MOL005017 | Phaseol       | PIM1          | Proto-oncogene serine/threonine-protein kinase Pim-1 |
| MOL005017 | Phaseol       | CCNA2         | Cyclin-A2                                            |
| MOL012922 | I-SPD         | PTGS1         | Prostaglandin G/H synthase 1                         |
| MOL012922 | I-SPD         | DRD1          | Dopamine D1 receptor                                 |
| MOL012922 | I-SPD         | CHRM3         | Muscarinic acetylcholine receptor M3                 |
| MOL012922 | I-SPD         | KCNH2         | Potassium voltage-gated channel subfamily H member 2 |
| MOL012922 | I-SPD         | CHRM1         | Muscarinic acetylcholine receptor M1                 |
| MOL012922 | I-SPD         | DRD5          | D(1B) dopamine receptor                              |
| MOL012922 | I-SPD         | SCN5A         | Sodium channel protein type 5 subunit alpha          |
| MOL012922 | I-SPD         | F10           | Coagulation factor Xa                                |
| MOL012922 | I-SPD         | CHRM5         | Muscarinic acetylcholine receptor M5                 |
| MOL012922 | I-SPD         | PTGS2         | Prostaglandin G/H synthase 2                         |
| MOL012922 | I-SPD         | CA2           | Carbonic anhydrase II                                |
| MOL012922 | I-SPD         | ADRA2C        | Alpha-2C adrenergic receptor                         |

|           |                      |        |                                                             |
|-----------|----------------------|--------|-------------------------------------------------------------|
| MOL012922 | I-SPD                | CHRM4  | Muscarinic acetylcholine receptor M4                        |
| MOL012922 | I-SPD                | RXRA   | Retinoic acid receptor RXR-alpha                            |
| MOL012922 | I-SPD                | OPRD1  | Delta-type opioid receptor                                  |
| MOL012922 | I-SPD                | HTR2A  | 5-hydroxytryptamine 2A receptor                             |
| MOL012922 | I-SPD                | ADRA1A | Alpha-1A adrenergic receptor                                |
| MOL012922 | I-SPD                | HTR2C  | 5-hydroxytryptamine 2C receptor                             |
| MOL012922 | I-SPD                | CHRM2  | Muscarinic acetylcholine receptor M2                        |
| MOL012922 | I-SPD                | ADRA2B | Alpha-2B adrenergic receptor                                |
| MOL012922 | I-SPD                | ADRA1B | Alpha-1B adrenergic receptor                                |
| MOL012922 | I-SPD                | DRD3   | D(3) dopamine receptor                                      |
| MOL012922 | I-SPD                | SLC6A3 | Sodium-dependent dopamine transporter                       |
| MOL012922 | I-SPD                | ADRB2  | Beta-2 adrenergic receptor                                  |
| MOL012922 | I-SPD                | ADRA1D | Alpha-1D adrenergic receptor                                |
| MOL012922 | I-SPD                | SLC6A4 | Sodium-dependent serotonin transporter                      |
| MOL012922 | I-SPD                | OPRM1  | Mu-type opioid receptor                                     |
| MOL012922 | I-SPD                | HSP90  | Heat shock protein HSP 90                                   |
| MOL012922 | I-SPD                | PRKACA | mRNA of PKA Catalytic Subunit C-alpha                       |
| MOL012922 | I-SPD                | CALM1  | Calmodulin                                                  |
| MOL000433 | FA                   | CDK2   | Cell division protein kinase 2                              |
| MOL000433 | FA                   | GSK3B  | Glycogen synthase kinase-3 beta                             |
| MOL013078 | praeruptorin E       | KCNH2  | Potassium voltage-gated channel subfamily H member 2        |
| MOL013078 | praeruptorin E       | F10    | Coagulation factor Xa                                       |
| MOL013078 | praeruptorin E       | PTGS2  | Prostaglandin G/H synthase 2                                |
| MOL013078 | praeruptorin E       | CA2    | Carbonic anhydrase II                                       |
| MOL013078 | praeruptorin E       | TOP2   | DNA topoisomerase II                                        |
| MOL013078 | praeruptorin E       | HSP90  | Heat shock protein HSP 90                                   |
| MOL013078 | praeruptorin E       | PRSS1  | Trypsin-1                                                   |
| MOL013078 | praeruptorin E       | CALM1  | Calmodulin                                                  |
| MOL013078 | praeruptorin E       | NCOA1  | Nuclear receptor coactivator 1                              |
| MOL013087 | Peucedanocoumarin II | KCNH2  | Potassium voltage-gated channel subfamily H member 2        |
| MOL013087 | Peucedanocoumarin II | F10    | Coagulation factor Xa                                       |
| MOL013087 | Peucedanocoumarin II | PTGS2  | Prostaglandin G/H synthase 2                                |
| MOL013087 | Peucedanocoumarin II | PTPN1  | mRNA of Protein-tyrosine phosphatase, non-receptor type 1   |
| MOL013087 | Peucedanocoumarin II | TOP2   | DNA topoisomerase II                                        |
| MOL013087 | Peucedanocoumarin II | DPP4   | Dipeptidyl peptidase IV                                     |
| MOL013087 | Peucedanocoumarin II | HSP90  | Heat shock protein HSP 90                                   |
| MOL013087 | Peucedanocoumarin II | NCOA1  | Nuclear receptor coactivator 1                              |
| MOL013087 | Peucedanocoumarin II | KCNMA1 | Calcium-activated potassium channel subunit alpha 1         |
| MOL004792 | nodakenin            | ESR1   | Estrogen receptor                                           |
| MOL004792 | nodakenin            | PTGS2  | Prostaglandin G/H synthase 2                                |
| MOL004792 | nodakenin            | PIM1   | Proto-oncogene serine/threonine-protein kinase Pim-1        |
| MOL004792 | nodakenin            | ACHE   | Acetylcholinesterase                                        |
| MOL001558 | sesamin              | F10    | Coagulation factor Xa                                       |
| MOL001558 | sesamin              | PTGS2  | Prostaglandin G/H synthase 2                                |
| MOL001558 | sesamin              | SCN5A  | Sodium channel protein type 5 subunit alpha                 |
| MOL001558 | sesamin              | CCND1  | G1/S-specific cyclin-D1                                     |
| MOL001558 | sesamin              | IL10   | Interleukin-10                                              |
| MOL001558 | sesamin              | FASN   | Fatty acid synthase                                         |
| MOL001558 | sesamin              | ACACA  | Acetyl-CoA carboxylase 1                                    |
| MOL001558 | sesamin              | H6PD   | Glucose-6-phosphate 1-dehydrogenase                         |
| MOL001558 | sesamin              | NOS3   | Nitric oxide synthase, endothelial                          |
| MOL001558 | sesamin              | ECE1   | Endothelin-converting enzyme 1                              |
| MOL001558 | sesamin              | ACADM  | Medium-chain specific acyl-CoA dehydrogenase, mitochondrial |
| MOL001558 | sesamin              | CYP2B6 | Cytochrome P450 2B6                                         |
| MOL001558 | sesamin              | UGT1A1 | UDP-glucuronosyltransferase 1-1                             |
| MOL001558 | sesamin              | SREBF1 | Sterol regulatory element-binding protein 1                 |
| MOL001558 | sesamin              | NOX3   | NADPH oxidase 3                                             |
| MOL001558 | sesamin              | NOX1   | NADPH oxidase 1                                             |
| MOL001558 | sesamin              | ACOX1  | Peroxisomal acyl-coenzyme A oxidase 1                       |
| MOL001558 | sesamin              | ACLY   | ATP-citrate synthase                                        |
| MOL001558 | sesamin              | EHHADH | Peroxisomal bifunctional enzyme                             |
| MOL001558 | sesamin              | AUH    | Methylglutaconyl-CoA hydratase, mitochondrial               |
| MOL001558 | sesamin              | HADHB  | Trifunctional enzyme subunit beta, mitochondrial            |
| MOL001558 | sesamin              | DECR1  | 2,4-dienoyl-CoA reductase, mitochondrial                    |
| MOL001558 | sesamin              | EC11   | 3,2-trans-enoyl-CoA isomerase, mitochondrial                |
| MOL005384 | suchilactone         | KCNH2  | Potassium voltage-gated channel subfamily H member 2        |
| MOL005384 | suchilactone         | SCN5A  | Sodium channel protein type 5 subunit alpha                 |
| MOL005384 | suchilactone         | F10    | Coagulation factor Xa                                       |
| MOL005384 | suchilactone         | PTGS2  | Prostaglandin G/H synthase 2                                |
| MOL005384 | suchilactone         | F7     | Coagulation factor VII                                      |

|           |                                                            |        |                                                           |
|-----------|------------------------------------------------------------|--------|-----------------------------------------------------------|
| MOL005384 | suchilactone                                               | PTPN1  | mRNA of Protein-tyrosine phosphatase, non-receptor type 1 |
| MOL005384 | suchilactone                                               | ADRB2  | Beta-2 adrenergic receptor                                |
| MOL005384 | suchilactone                                               | HSP90  | Heat shock protein HSP 90                                 |
| MOL005384 | suchilactone                                               | NCOA1  | Nuclear receptor coactivator 1                            |
| MOL005384 | suchilactone                                               | KCNMA1 | Calcium-activated potassium channel subunit alpha 1       |
| MOL005384 | suchilactone                                               | CALM1  | Calmodulin                                                |
| MOL005384 | suchilactone                                               | PTGS1  | Prostaglandin G/H synthase 1                              |
| MOL005384 | suchilactone                                               | RXRA   | Retinoic acid receptor RXR-alpha                          |
| MOL005384 | suchilactone                                               | PDE3A  | CGMP-inhibited 3',5'-cyclic phosphodiesterase A           |
| MOL005384 | suchilactone                                               | ADRA1D | Alpha-1D adrenergic receptor                              |
| MOL005384 | suchilactone                                               | PRKACA | mRNA of PKA Catalytic Subunit C-alpha                     |
| MOL009363 | tuberostemonine C                                          | AR     | Androgen receptor                                         |
| MOL009363 | tuberostemonine C                                          | CHRM2  | Muscarinic acetylcholine receptor M2                      |
| MOL009363 | tuberostemonine C                                          | NR3C2  | Mineralocorticoid receptor                                |
| MOL009363 | tuberostemonine C                                          | OPRM1  | Mu-type opioid receptor                                   |
| MOL009377 | bisdehydroneotuberostemonine                               | NOS2   | Nitric oxide synthase, inducible                          |
| MOL009377 | bisdehydroneotuberostemonine                               | DRD1   | Dopamine D1 receptor                                      |
| MOL009377 | bisdehydroneotuberostemonine                               | CHRM3  | Muscarinic acetylcholine receptor M3                      |
| MOL009377 | bisdehydroneotuberostemonine                               | CHRM1  | Muscarinic acetylcholine receptor M1                      |
| MOL009377 | bisdehydroneotuberostemonine                               | AR     | Androgen receptor                                         |
| MOL009377 | bisdehydroneotuberostemonine                               | CHRM5  | Muscarinic acetylcholine receptor M5                      |
| MOL009377 | bisdehydroneotuberostemonine                               | PTGS2  | Prostaglandin G/H synthase 2                              |
| MOL009377 | bisdehydroneotuberostemonine                               | CHRM4  | Muscarinic acetylcholine receptor M4                      |
| MOL009377 | bisdehydroneotuberostemonine                               | ADRA1A | Alpha-1A adrenergic receptor                              |
| MOL009377 | bisdehydroneotuberostemonine                               | CHRM2  | Muscarinic acetylcholine receptor M2                      |
| MOL009377 | bisdehydroneotuberostemonine                               | ADRA1B | Alpha-1B adrenergic receptor                              |
| MOL009377 | bisdehydroneotuberostemonine                               | ADRB2  | Beta-2 adrenergic receptor                                |
| MOL009377 | bisdehydroneotuberostemonine                               | DRD2   | D(2) dopamine receptor                                    |
| MOL009377 | bisdehydroneotuberostemonine                               | OPRM1  | Mu-type opioid receptor                                   |
| MOL009377 | bisdehydroneotuberostemonine                               | CHRNA7 | Neuronal acetylcholine receptor protein, alpha-7 chain    |
| MOL009381 | bisdehydrostemoninine A                                    | AR     | Androgen receptor                                         |
| MOL009381 | bisdehydrostemoninine A                                    | PTGS2  | Prostaglandin G/H synthase 2                              |
| MOL009386 | 3,3'-bis-(3,4-dihydro-4-hydroxy-6-methoxy)-2H-1-benzopyran | KCNH2  | Potassium voltage-gated channel subfamily H member 2      |
| MOL009386 | 3,3'-bis-(3,4-dihydro-4-hydroxy-6-methoxy)-2H-1-benzopyran | ESR1   | Estrogen receptor                                         |
| MOL009386 | 3,3'-bis-(3,4-dihydro-4-hydroxy-6-methoxy)-2H-1-benzopyran | PTGS2  | Prostaglandin G/H synthase 2                              |
| MOL009386 | 3,3'-bis-(3,4-dihydro-4-hydroxy-6-methoxy)-2H-1-benzopyran | ADRB2  | Beta-2 adrenergic receptor                                |
| MOL009386 | 3,3'-bis-(3,4-dihydro-4-hydroxy-6-methoxy)-2H-1-benzopyran | HSP90  | Heat shock protein HSP 90                                 |
| MOL009386 | 3,3'-bis-(3,4-dihydro-4-hydroxy-6-methoxy)-2H-1-benzopyran | PIM1   | Proto-oncogene serine/threonine-protein kinase Pim-1      |
| MOL009386 | 3,3'-bis-(3,4-dihydro-4-hydroxy-6-methoxy)-2H-1-benzopyran | CCNA2  | Cyclin-A2                                                 |
| MOL009386 | 3,3'-bis-(3,4-dihydro-4-hydroxy-6-methoxy)-2H-1-benzopyran | CALM1  | Calmodulin                                                |
| MOL009387 | didehydrotuberostemonine                                   | CHRM3  | Muscarinic acetylcholine receptor M3                      |
| MOL009387 | didehydrotuberostemonine                                   | CHRM1  | Muscarinic acetylcholine receptor M1                      |
| MOL009387 | didehydrotuberostemonine                                   | AR     | Androgen receptor                                         |
| MOL009387 | didehydrotuberostemonine                                   | SCN5A  | Sodium channel protein type 5 subunit alpha               |
| MOL009387 | didehydrotuberostemonine                                   | CHRM5  | Muscarinic acetylcholine receptor M5                      |
| MOL009387 | didehydrotuberostemonine                                   | PTGS2  | Prostaglandin G/H synthase 2                              |
| MOL009387 | didehydrotuberostemonine                                   | CHRM4  | Muscarinic acetylcholine receptor M4                      |
| MOL009387 | didehydrotuberostemonine                                   | CHRM2  | Muscarinic acetylcholine receptor M2                      |
| MOL009387 | didehydrotuberostemonine                                   | ADRA1B | Alpha-1B adrenergic receptor                              |
| MOL009387 | didehydrotuberostemonine                                   | OPRM1  | Mu-type opioid receptor                                   |
| MOL009387 | didehydrotuberostemonine                                   | DPP4   | Dipeptidyl peptidase IV                                   |
| MOL009388 | dihydrostemoninine                                         | AR     | Androgen receptor                                         |
| MOL009431 | stemonine                                                  | AR     | Androgen receptor                                         |
| MOL009433 | stemoninine B                                              | NOS2   | Nitric oxide synthase, inducible                          |
| MOL009433 | stemoninine B                                              | CHRM3  | Muscarinic acetylcholine receptor M3                      |
| MOL009433 | stemoninine B                                              | CHRM1  | Muscarinic acetylcholine receptor M1                      |
| MOL009433 | stemoninine B                                              | AR     | Androgen receptor                                         |
| MOL009433 | stemoninine B                                              | PTGS2  | Prostaglandin G/H synthase 2                              |
| MOL009433 | stemoninine B                                              | CHRM2  | Muscarinic acetylcholine receptor M2                      |
| MOL009433 | stemoninine B                                              | ADRA1B | Alpha-1B adrenergic receptor                              |

Supplementary Table 3: A total of 63 potential targets of SGM in the treatment of asthma

| UniProt ID | Target Symbol | Details                                                   |
|------------|---------------|-----------------------------------------------------------|
| P06401     | PGR           | Progesterone receptor                                     |
| P35228     | NOS2          | Nitric oxide synthase, inducible                          |
| P03372     | ESR1          | Estrogen receptor                                         |
| P37231     | PPARG         | Peroxisome proliferator activated receptor gamma          |
| P35354     | PTGS2         | Prostaglandin G/H synthase 2                              |
| Q16539     | MAPK14        | Mitogen-activated protein kinase 14                       |
| P49841     | GSK3B         | Glycogen synthase kinase-3 beta                           |
| O14757     | CHEK1         | Serine/threonine-protein kinase Chk1                      |
| P11309     | PIM1          | Proto-oncogene serine/threonine-protein kinase Pim-1      |
| P20248     | CCNA2         | Cyclin-A2                                                 |
| P00742     | F10           | Coagulation factor Xa                                     |
| P08709     | F7            | Coagulation factor VII                                    |
| P0DP23     | CALM1         | Calmodulin                                                |
| P00441     | SOD1          | Superoxide dismutase [Cu-Zn]                              |
| P11229     | CHRM1         | Muscarinic acetylcholine receptor M1                      |
| P10275     | AR            | Androgen receptor                                         |
| Q14524     | SCN5A         | Sodium channel protein type 5 subunit alpha               |
| P22303     | ACHE          | Acetylcholinesterase                                      |
| P35368     | ADRA1B        | Alpha-1B adrenergic receptor                              |
| P07550     | ADRB2         | Beta-2 adrenergic receptor                                |
| Q92731     | ESR2          | Estrogen receptor beta                                    |
| P24941     | CDK2          | Cell division protein kinase 2                            |
| P28702     | RXRB          | Retinoic acid receptor RXR-beta                           |
| P01857     | IGHG1         | Ig gamma-1 chain C region                                 |
| P07477     | PRSS1         | Trypsin-1                                                 |
| Q15596     | NCOA2         | Nuclear receptor coactivator 2                            |
| Q15788     | NCOA1         | Nuclear receptor coactivator 1                            |
| P07900     | HSP90         | Heat shock protein HSP 90                                 |
| P23219     | PTGS1         | Prostaglandin G/H synthase 1                              |
| P21728     | DRD1          | Dopamine D1 receptor                                      |
| P20309     | CHRM3         | Muscarinic acetylcholine receptor M3                      |
| P21918     | DRD5          | D(1B) dopamine receptor                                   |
| P08912     | CHRM5         | Muscarinic acetylcholine receptor M5                      |
| P00918     | CA2           | Carbonic anhydrase II                                     |
| P18825     | ADRA2C        | Alpha-2C adrenergic receptor                              |
| P08173     | CHRM4         | Muscarinic acetylcholine receptor M4                      |
| P41143     | OPRD1         | Delta-type opioid receptor                                |
| P28223     | HTR2A         | 5-hydroxytryptamine 2A receptor                           |
| P35348     | ADRA1A        | Alpha-1A adrenergic receptor                              |
| P28335     | HTR2C         | 5-hydroxytryptamine 2C receptor                           |
| P08172     | CHRM2         | Muscarinic acetylcholine receptor M2                      |
| P18089     | ADRA2B        | Alpha-2B adrenergic receptor                              |
| P35462     | DRD3          | D(3) dopamine receptor                                    |
| Q01959     | SLC6A3        | Sodium-dependent dopamine transporter                     |
| P25100     | ADRA1D        | Alpha-1D adrenergic receptor                              |
| P31645     | SLC6A4        | Sodium-dependent serotonin transporter                    |
| P35372     | OPRM1         | Mu-type opioid receptor                                   |
| P11388     | TOP2          | DNA topoisomerase II                                      |
| P18031     | PTPN1         | mRNA of Protein-tyrosine phosphatase, non-receptor type 1 |
| P27487     | DPP4          | Dipeptidyl peptidase IV                                   |
| Q12791     | KCNMA1        | Calcium-activated potassium channel subunit alpha 1       |
| P24385     | CCND1         | G1/S-specific cyclin-D1                                   |
| P22301     | IL10          | Interleukin-10                                            |
| P29474     | NOS3          | Nitric oxide synthase, endothelial                        |
| P42892     | ECE1          | Endothelin-converting enzyme 1                            |
| P22309     | UGT1A1        | UDP-glucuronosyltransferase 1-1                           |
| Q9HBY0     | NOX3          | NADPH oxidase 3                                           |
| Q9Y5S8     | NOX1          | NADPH oxidase 1                                           |
| P55084     | HADHB         | Trifunctional enzyme subunit beta, mitochondrial          |
| Q14432     | PDE3A         | CGMP-inhibited 3',5'-cyclic phosphodiesterase A           |
| P08235     | NR3C2         | Mineralocorticoid receptor                                |
| P14416     | DRD2          | D(2) dopamine receptor                                    |
| P36544     | CHRNA7        | Neuronal acetylcholine receptor protein, alpha-7 chain    |
